# Supplementary material for: ‘Hairy’ root extracts as source for ‘green’ synthesis of silver nanoparticles and medical applications
Source: PubMed Central journal article supplement (PMC9057394; doi:10.1039/d0ra07784d), 2020-10-27
Supplement: RA-010-D0RA07784D-s001.pdf [file RA-010-D0RA07784D-s001.pdf]

## Supplementary materials

### **‘Hairy’ root Extracts as Source for ‘Green’ Synthesis of Silver Nanoparticles and Medical Applications**

**Natalia Kobylinska<sup>1</sup>, Anatolij Shakhovsky<sup>2</sup>, Olena Khainakova<sup>3</sup>, Dmytro Klymchuk<sup>4</sup>, Liliya Avdeeva<sup>5</sup>, Yakiv Ratushnyak<sup>2</sup>, Volodymyr Duplij<sup>2</sup>, Nadiia Matvieieva<sup>2</sup>**

<sup>1</sup>*Taras Shevchenko National University of Kyiv, 64 Volodymyrska Str., Kyiv, 01601, Ukraine*

<sup>2</sup>*Institute of Cell Biology and Genetic Engineering, NAS of Ukraine, 148 Zabolotnogo Str, Kyiv, 03143, Ukraine*

<sup>3</sup>*University of Oviedo, 8 Julián Clavería Av., Oviedo, 33006, Spain*

<sup>4</sup>*M.G.Kholodny Institute of Botany, NAS of Ukraine, 2 Tereshchenkivska Str, Kyiv, 02000, Ukraine*

<sup>5</sup>*Zabolotny Institute of Microbiology and Virology, NAS of Ukraine, 154 Zabolotnogo Str, Kyiv, 03143, Ukraine*

Corresponding e-mail: [kobilinskaya@univ.kiev.ua](mailto:kobilinskaya@univ.kiev.ua)

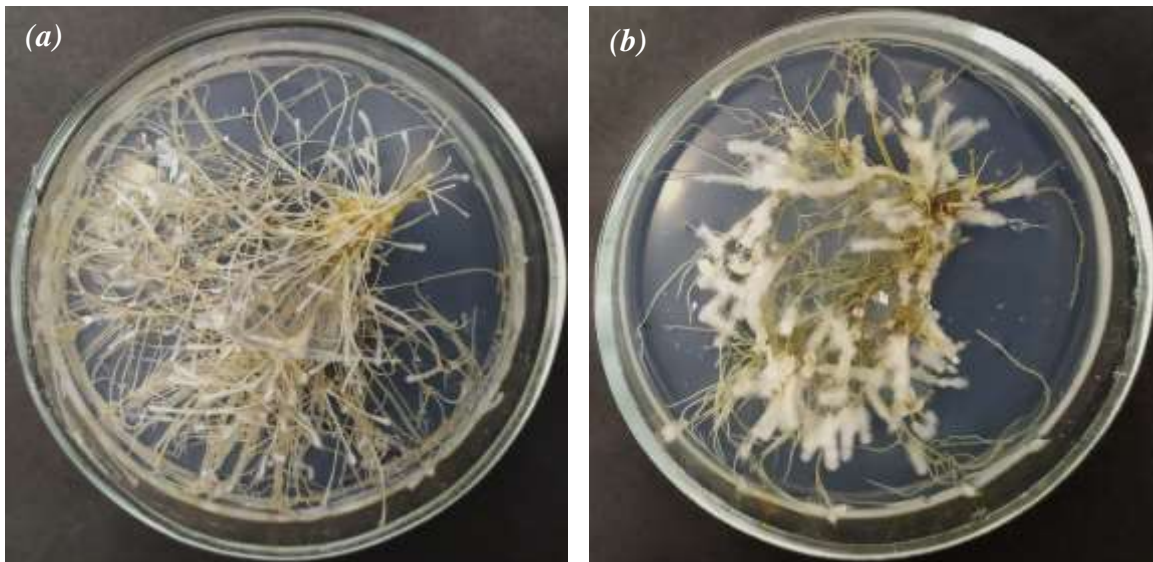

**Fig. S1.** Images of *Artemisia annua* (a) and *Artemisia tilesii* (b) “hairy” root clones

**Cmpd 5, 12.1 min**

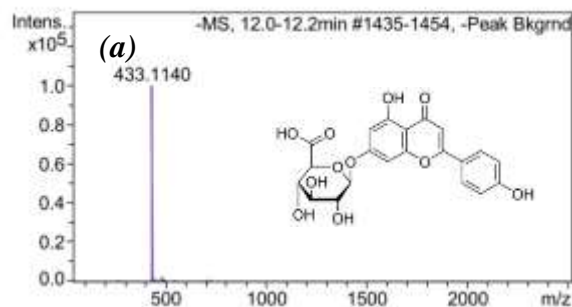

**Cmpd 7, 17.6 min**

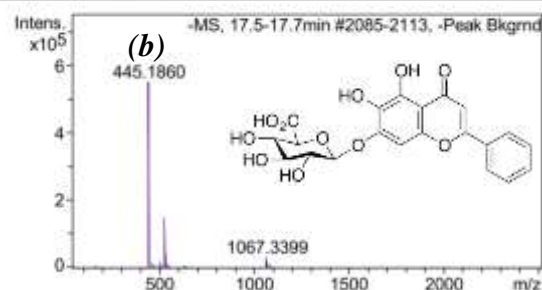

**Cmpd 8, 36.9 min**

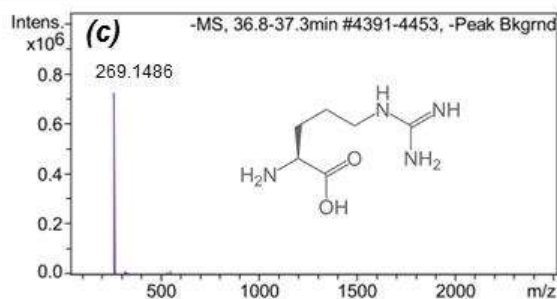

**Cmpd 9, 38.4 min**

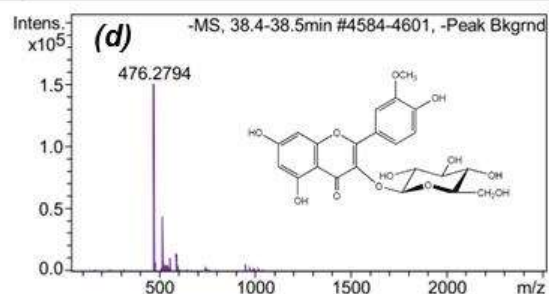

**Cmpd 14, 40.6 min**

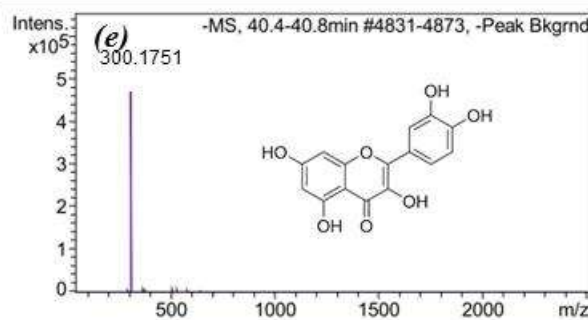

**Cmpd 15, 41.9 min**

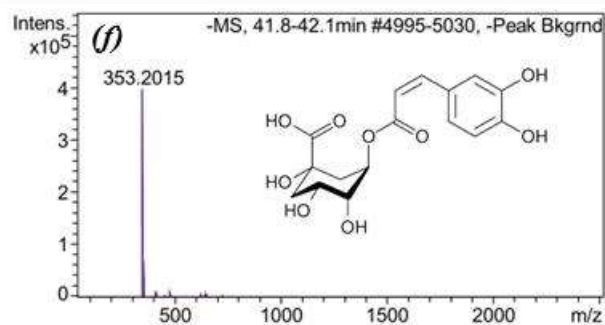

Cmpd 16, 42.5 min

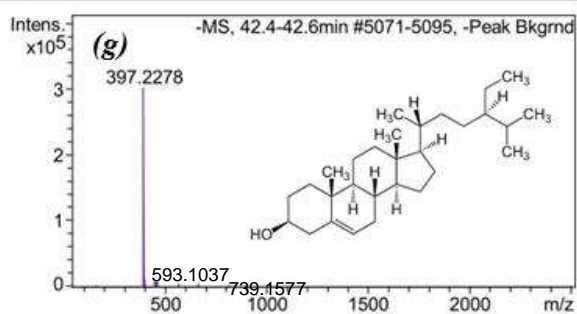

Cmpd 20, 43.7 min

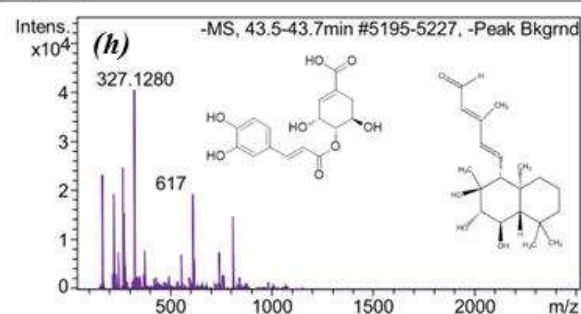

Cmpd 21, 43.9 min

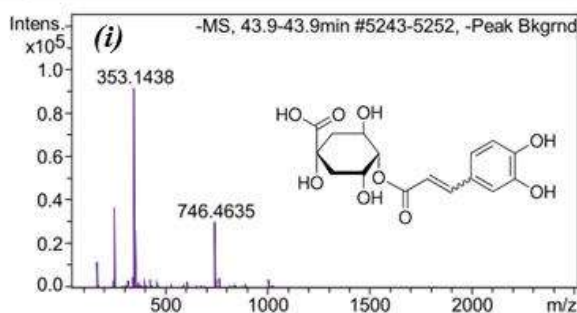

Cmpd 24, 44.6 min

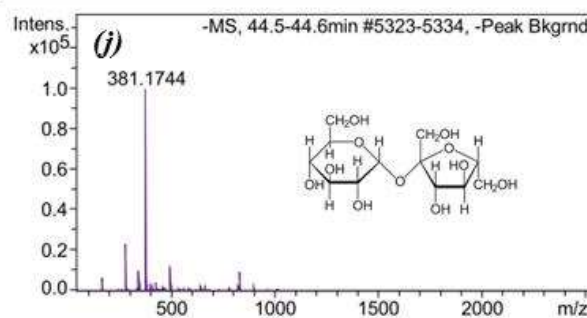

Cmpd 25, 45.0 min

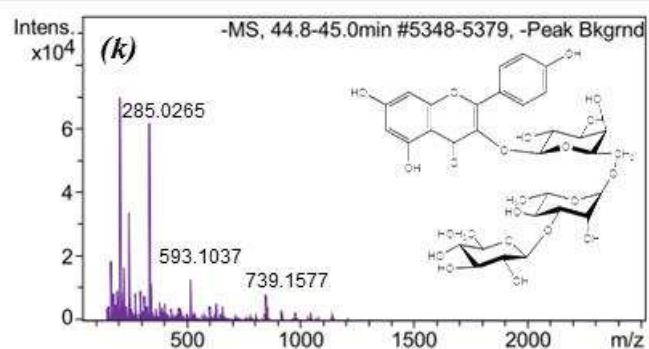

**Fig. S2.** Fragmentation behavior of the ethanol extracts of *A. tilesii* roots (*a* - Apigenin-7-O-glucoside; *b* - Baicalein-7-O-glucuronide; *c* - Arginin; *d* - Isorhamnetin 3-O-glucoside; *e* - Quercetin; *f* - Chlorogenic acid; *g* - Sitosterol; *h* - Caffeoylshikimic acids and Sterebin J/Sterebin I; *i* - Caffeoylquinic acid; *j* - Sucrose+K<sup>+</sup>; *k* - kaempferol-3-O-galactoside-rhamnoside-7-O-rhamnoside) MS in negative ionization mode.

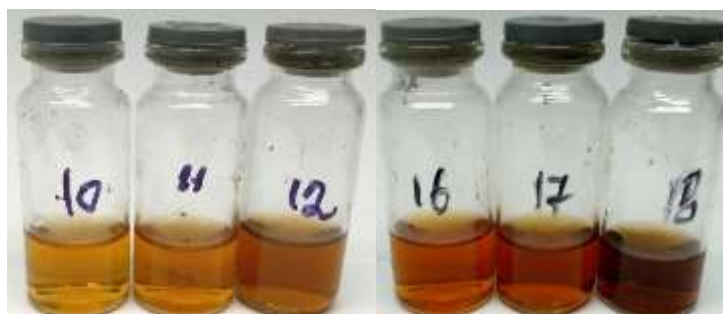

**Fig. S3.** Stability of AgNPs in six month after the initiation by *Artemisia tilesii* “hairy” root extracts

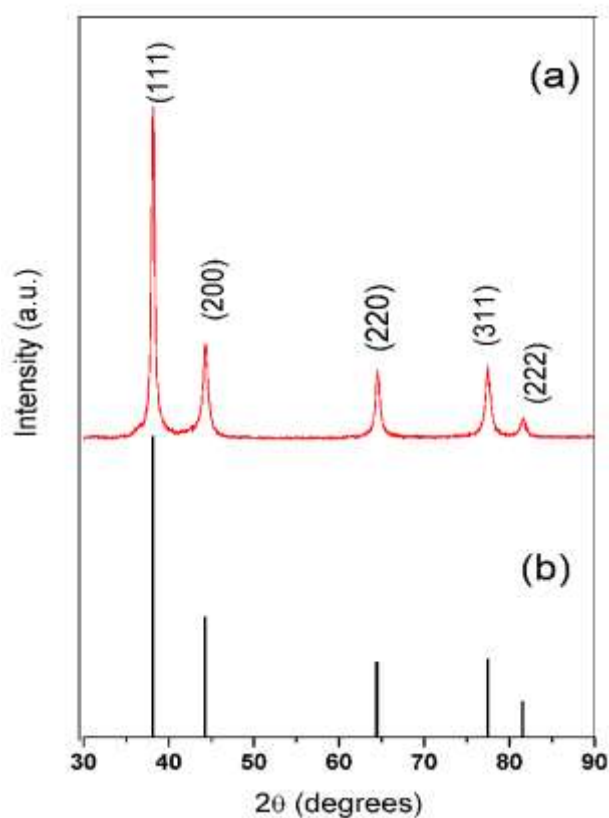

**Fig. S4.** XRD pattern of prepared AgNPs by *Artemisia tilesii* "hairy" root extracts (a) and JCPDS file No. 89-3722 (b)

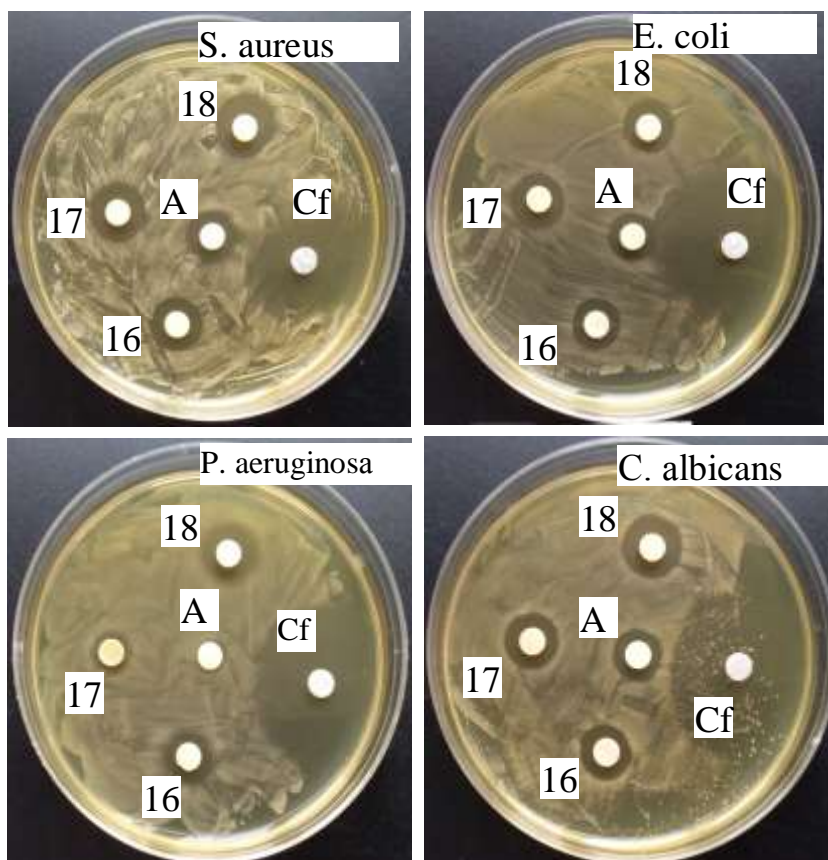

**Fig. S5.** Antimicrobial effect of AgNPs obtained from *A. tilesii* "hairy" root clones [22k: 16, 17,18], AgNO<sub>3</sub>(solution) and antibiotic on *St. aureus*, *Candida albicans*, *Pseudomonas Aeruginosa* and *Escherichia coli*.
